# Supplementary material
Source: PubMed Central journal article supplement (PMC4197567)
Supplement: supp_jlb.4MA0214-077R_jlb.4MA0214-077RSuppTable1.pdf [file supp_jlb.4MA0214-077R_jlb.4MA0214-077RSuppTable1.pdf]

**Supplementary Table-1: Demographic Information and Clinical Characteristics of Patients.**

| Patients who experienced MDDC defects |     |                   |                   |                   |                                                |                                       |
|---------------------------------------|-----|-------------------|-------------------|-------------------|------------------------------------------------|---------------------------------------|
| Patient ID                            | Sex | Age               | ISS at Admission  | Maximum MODS      | Injury Type                                    | Infection                             |
| 124                                   | M   | 34                | 22                | 7                 | Blunt trauma due to construction site accident | Bacteremia                            |
| 129                                   | M   | 57                | 26                | 10                | Blunt trauma due to Motorvehicle crash (MVC)   | Pneumonia, led to sepsis              |
| 135                                   | M   | 76                | 33                | 16                | Burn                                           | Bacteremia, led to sepsis             |
| 140                                   | F   | 43                | 32                | 11                | Burn                                           | Pneumonia that led to sepsis          |
| 146                                   | M   | 42                | 21                | 8                 | Blunt trauma due to MVC                        | Pneumonia                             |
| 147                                   | M   | 35                | 24                | 6                 | Violent Assault                                | NONE                                  |
| 148                                   | M   | 61                | 27                | 5                 | Blunt trauma due to MVC                        | NONE                                  |
| 160                                   | M   | 20                | 25                | 14                | Burn caused by Explosion                       | Pneumoni that led to sepsis           |
| 166                                   | M   | 40                | 22                | 13                | Burn                                           | Pneumonia                             |
| 172                                   | F   | 52                | 25                | 9                 | Blunt trauma due to MVC                        | Pneumonia                             |
| 173                                   | M   | 20                | 25                | 7                 | Blunt trauma due to MVC                        | NONE                                  |
| 180                                   | M   | 35                | 22                | 9                 | Burn                                           | Pneumonia that led to sepsis          |
| 183                                   | M   | 23                | 28                | 7                 | Multiple gunshot wound (torso, jaw, arms)      | NONE                                  |
| 209                                   | M   | 23                | 30                | 11                | Blunt trauma and burn due to MVC               | Bacteremia                            |
| 220                                   | M   | 39                | 28                | 8                 | Gunshot wound (Chest, Shoulder)                | Pneumonia & Bacteremia; led to sepsis |
| 229                                   | M   | 64                | 22                | 11                | Blunt trauma due to MVC                        | NONE                                  |
| 236                                   | M   | 44                | 28                | 8                 | Blunt trauma [Motorcycling accident]           | NONE                                  |
| 237                                   | F   | 27                | 27                | 13                | Blunt trauma due to MVC                        | NONE                                  |
| <b>Mean ± SEM</b>                     |     | <b>40.8 ± 3.8</b> | <b>25.9 ± 0.8</b> | <b>9.6 ± 0.7*</b> |                                                |                                       |

| Patients who never experienced MDDC defects |     |                   |                   |                  |                                                 |                           |
|---------------------------------------------|-----|-------------------|-------------------|------------------|-------------------------------------------------|---------------------------|
| Patient ID                                  | Sex | Age               | ISS at Admission  | Maximum MODS     | Injury Type                                     | Infection                 |
| 126                                         | F   | 21                | 22                | 11               | Gunshot wound                                   | NONE                      |
| 127                                         | M   | 39                | 27                | 9                | Blunt trauma due to MVC                         | NONE                      |
| 128                                         | M   | 18                | 25                | 10               | Burn                                            | Pneumonia                 |
| 130                                         | F   | 61                | 23                | 8                | Burn                                            | NONE                      |
| 132                                         | M   | 44                | 25                | 7                | Blunt trauma due to MVC                         | Pneumonia, led to sepsis  |
| 134                                         | M   | 62                | 24                | 9                | Blunt trauma due to MVC [ Ejected from vehicle] | NONE                      |
| 136                                         | F   | 49                | 22                | 10               | Blunt trauma [Hit by car]                       | NONE                      |
| 141                                         | M   | 47                | 30                | 10               | Blunt trauma [Aviation accident]                | Pneumonia, led to sepsis  |
| 145                                         | F   | 18                | 24                | 7                | Blunt trauma due to MVC                         | NONE                      |
| 149                                         | M   | 26                | 21                | 13               | Blunt trauma [Hit by car]                       | NONE                      |
| 150                                         | F   | 69                | 25                | 6                | Burn                                            | NONE                      |
| 163                                         | M   | 67                | 25                | 6                | Blunt trauma [Fall]                             | NONE                      |
| 164                                         | M   | 18                | 20                | 10               | Blunt trauma due to MVC                         | NONE                      |
| 174                                         | M   | 19                | 20                | 5                | Blunt trauma due to MVC                         | NONE                      |
| 177                                         | M   | 41                | 26                | 6                | Blunt trauma due to MVC                         | NONE                      |
| 179                                         | M   | 25                | 21                | 9                | Blunt trauma due to MVC                         | NONE                      |
| 181                                         | F   | 21                | 26                | 12               | Blunt trauma due to MVC                         | NONE                      |
| 184                                         | M   | 55                | 35                | 9                | Blunt trauma due to MVC                         | Pneumonia                 |
| 188                                         | M   | 75                | 35                | 9                | Blunt trauma due to MVC                         | Pneumonia, led to sepsis  |
| 191                                         | M   | 47                | 21                | 4                | Blunt trauma [Fall]                             | NONE                      |
| 194                                         | M   | 30                | 21                | 5                | Blunt trauma due to MVC                         | Pneumonia                 |
| 195                                         | F   | 21                | 27                | 7                | Blunt trauma due to MVC                         | Pneumonia, led to sepsis  |
| 201                                         | F   | 20                | 27                | 8                | Blunt trauma due to MVC                         | Pneumonia                 |
| 202                                         | F   | 24                | 22                | 11               | Blunt trauma [Hit by car]                       | Pneumonia                 |
| 204                                         | M   | 20                | 29                | 7                | Blunt trauma due to MVC                         | Pneumonia                 |
| 205                                         | M   | 43                | 39                | 14               | Multiple gunshot wound (chest, abdomen, arm)    | NONE                      |
| 206                                         | M   | 46                | 37                | 9                | Blunt trauma due to MVC, heavy hemorrhage       | NONE                      |
| 208                                         | M   | 50                | 24                | 8                | Blunt trauma due to MVC                         | NONE                      |
| 210                                         | F   | 22                | 26                | 3                | Blunt trauma due to MVC                         | NONE                      |
| 212                                         | M   | 65                | 29                | 6                | Blunt trauma [Hit by car]                       | NONE                      |
| 213                                         | M   | 63                | 31                | 7                | Blunt trauma due to MVC                         | Pneumonia                 |
| 215                                         | M   | 27                | 25                | 10               | Blunt trauma due to Motorcycle crash            | NONE                      |
| 216                                         | M   | 50                | 26                | 5                | Blunt trauma due to Motorcycle crash            | NONE                      |
| 217                                         | M   | 52                | 26                | 5                | Blunt trauma due to Motorcycle crash            | NONE                      |
| 218                                         | M   | 64                | 37                | 9                | Blunt trauma due to Motorcycle crash            | NONE                      |
| 221                                         | M   | 24                | 22                | 6                | Blunt trauma due to MVC                         | NONE                      |
| 222                                         | F   | 32                | 20                | 6                | Blunt trauma due to MVC                         | NONE                      |
| 226                                         | M   | 20                | 34                | 7                | Blunt trauma due to Motorcycle crash            | Pneumonia                 |
| 227                                         | M   | 53                | 33                | 5                | Blunt trauma due to MVC                         | NONE                      |
| 231                                         | F   | 26                | 34                | 7                | Blunt trauma due to MVC                         | NONE                      |
| 233                                         | M   | 18                | 24                | 4                | Blunt trauma due to MVC                         | NONE                      |
| 234                                         | M   | 36                | 23                | 6                | Blunt trauma [Hit by car]                       | Bacteremia, led to sepsis |
| 235                                         | M   | 26                | 28                | 8                | Blunt trauma due to MVC                         | NONE                      |
| 236                                         | M   | 44                | 26                | 6                | Blunt trauma due to MVC                         | NONE                      |
| 237                                         | F   | 27                | 21                | 13               | Blunt trauma due to MVC                         | NONE                      |
| 240                                         | M   | 26                | 21                | 6                | Blunt trauma [construction site injury]         | NONE                      |
| 241                                         | M   | 59                | 30                | 8                | Blunt trauma [Fall]                             | NONE                      |
| 244                                         | M   | 23                | 21                | 6                | Blunt trauma due to MVC                         | NONE                      |
| 245                                         | F   | 41                | 24                | 5                | Blunt trauma due to MVC                         | Bacteremia                |
| 246                                         | M   | 43                | 25                | 5                | Blunt trauma due to MVC                         | NONE                      |
| 248                                         | M   | 64                | 34                | 4                | Blunt trauma due to MVC                         | Pneumonia                 |
| 249                                         | F   | 58                | 20                | 6                | Blunt trauma [Horseriding accident]             | NONE                      |
| 251                                         | M   | 21                | 29                | 7                | Blunt trauma due to MVC                         | NONE                      |
| 253                                         | M   | 26                | 22                | 6                | Blunt trauma due to MVC                         | NONE                      |
| <b>Mean ± SEM</b>                           |     | <b>38.6 ± 2.3</b> | <b>26.2 ± 0.7</b> | <b>7.5 ± 0.3</b> |                                                 |                           |

\*p = 0.0041 by t test compared to average maximum MODS suffered by patients with differentiation competent MDDC. ISS- Injury Severity Score, Max MODS- Maximum Marshall's multiple organ dysfunction score suffered by patients during study period.
